# Supplementary figures and images for: Geographic Life History Differences Predict Genomic Divergence Better than Mitochondrial Barcodes or Phenotype
Source: MDPI journal article supplement (doi:10.3390/genes11030265), 2020-02-29

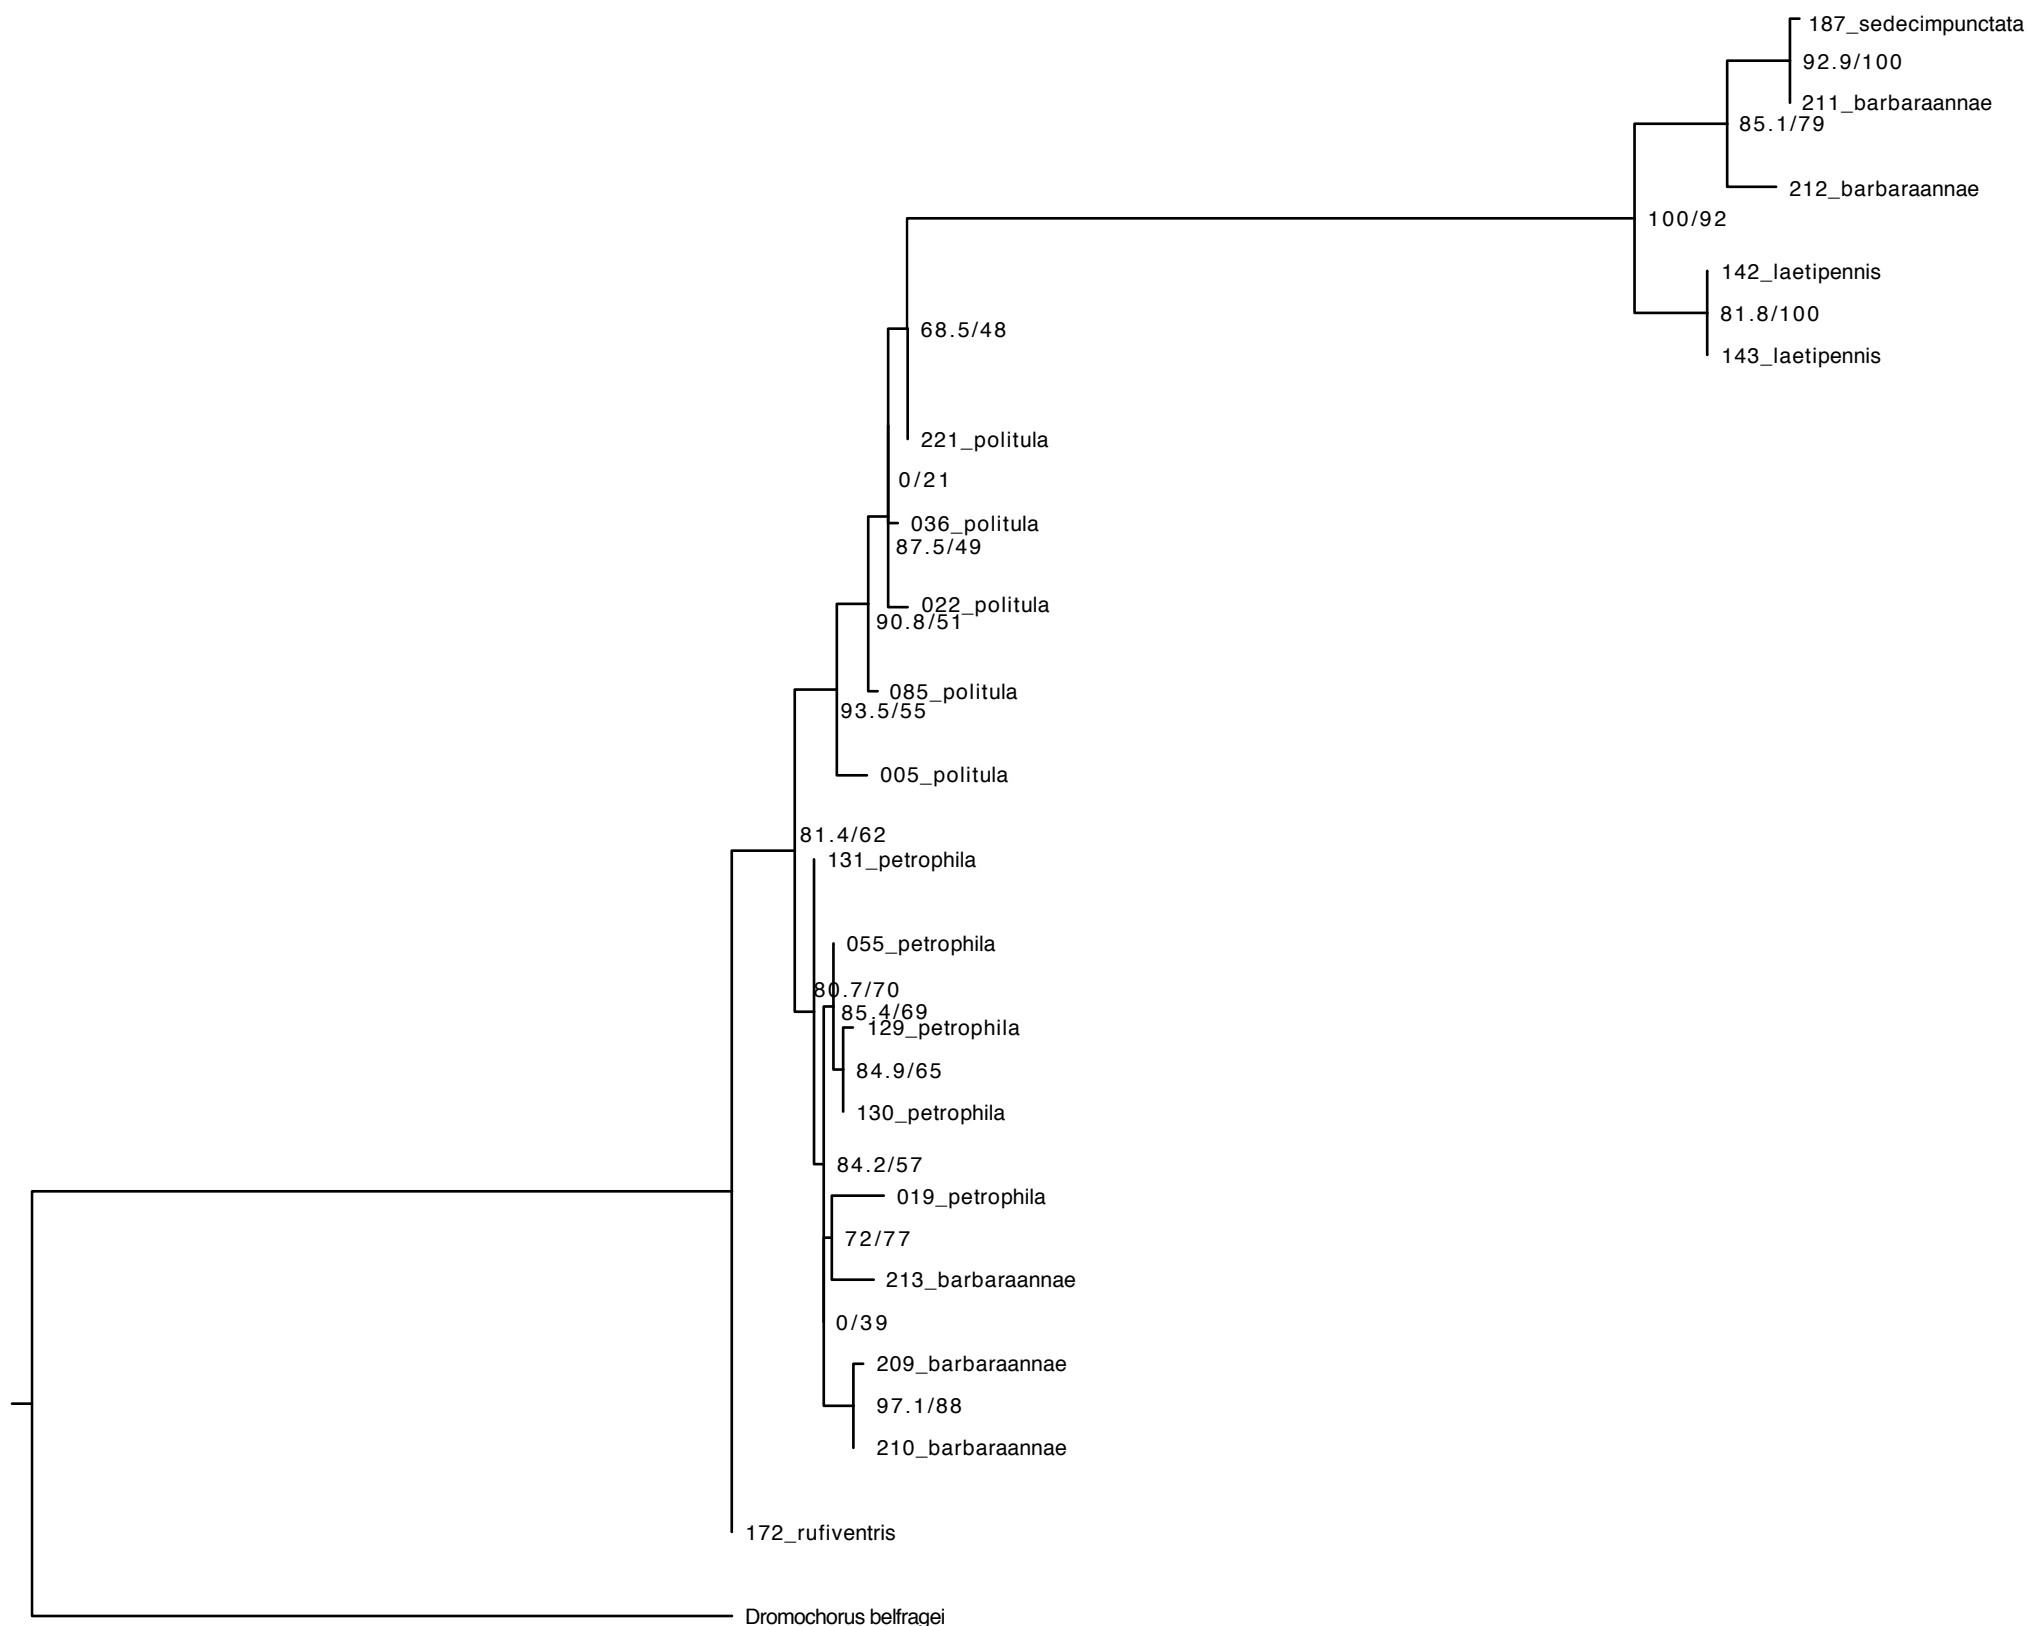

0.04

Supplement: s1 [file s1]

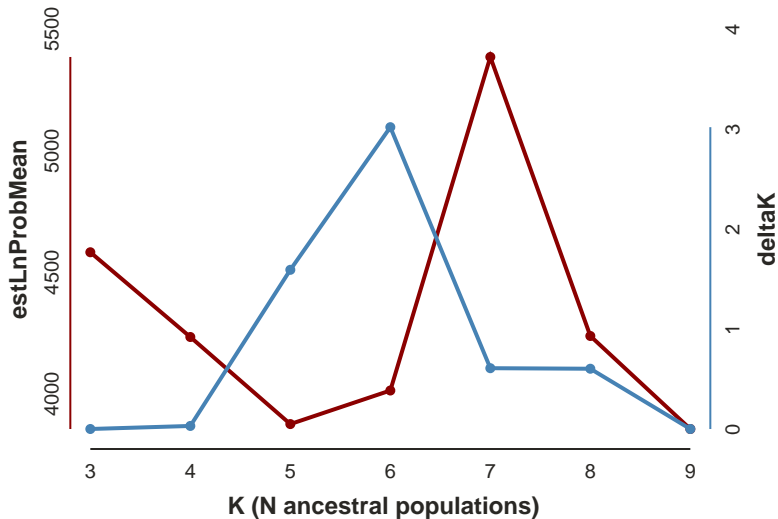

Supplement: s1 [file s1]
